# Supplementary material
Source: PubMed Central journal article supplement (PMC3391128)
Supplement: supp_M112.366484_jbc.M112.366484-1.pdf [file supp_M112.366484_jbc.M112.366484-1.pdf]

Supplemental Data to Brandmayr et al.

**Suppl Table 1****Amino acids modified by protein kinases in  $Ca_v\beta_2$  and  $Ca_v1.2$ .**

The publication reporting phosphorylation of a specific amino acid (a.a.) is indicated by a reference in brackets. A.a.'s without a reference are the corresponding a.a. in the other shown protein sequences taken from the gene bank.

| Species | Prot.Seq-No | Subunit    | Kinases          |                  |          |          |
|---------|-------------|------------|------------------|------------------|----------|----------|
|         |             |            | PKA              | CaMKII           | Akt/PKB  | PKG      |
| rabbit  | P15381      | $\alpha 1$ | S1928 (1)        | S1517, S1576     |          |          |
|         | CAA39289.1  | $\alpha 1$ |                  | S1512, S1570 (2) |          |          |
|         | X64297      | $\beta 2$  | S479, S480       | T500             | S576     | S496     |
| rat     | M80545      | $\beta 2$  | S478, S479 (3,4) | T498 (5)         | S574 (6) | S494 (7) |
| mouse   | Q01815      | $\alpha 1$ | S1898            | S1487, S1545     |          |          |
|         | Q8CC27      | $\beta 2$  | S529, S530       | T549             | S625     | S545     |

**Suppl Table 2****Nomenclature and genotype of mouse lines**

|                     |                                                                                              |
|---------------------|----------------------------------------------------------------------------------------------|
| Wt                  | $Ca_v\beta_2^{+/+}$                                                                          |
| $\beta$ Stop        | $Ca_v\beta_2^{P501Stop}/Ca_v\beta_2^{P501Stop}$                                              |
| Ctr $\beta$ Stop    | $Ca_v\beta_2^{P501Stop/+}$                                                                   |
| SA $\beta$ Stop     | $Ca_v1.2^{S1928A}/Ca_v1.2^{S1928A}, Ca_v\beta_2^{P501Stop}/Ca_v\beta_2^{P501Stop}$           |
| Ctr SA $\beta$ Stop | $Ca_v1.2^{S1928A/+}, Ca_v\beta_2^{P501Stop/+}$                                               |
| SF $\beta$ Stop     | $Ca_v1.2^{S1512/1570A}/Ca_v1.2^{S1512/1570A}, Ca_v\beta_2^{P501Stop}/Ca_v\beta_2^{P501Stop}$ |
| Ctr SF $\beta$ Stop | $Ca_v1.2^{S1512/1570A/+}, Ca_v\beta_2^{P501Stop/+}$                                          |
| $Ca_v1.2^{stop}$    | $Ca_v1.2^{N1904 stop}/Ca_v1.2^{N1904 stop}$                                                  |

**Suppl Tab 3****Inactivation time constants**

$I_{Ca}$  inactivation time constants in ms for various CMs from mice expressing the mutations heterozygous (Ctr) and homozygous ( $\beta$ stop/ $\beta$ stop). N, the number of CMs for Ctr;  $\beta$ stop/ $\beta$ stop. The fast and the slow inactivation time constant  $\pm$  isoproterenol (0.1  $\mu$ M) did not differ significantly between groups as tested by ANOVA followed by Bonferroni's posttest.

|                                          | Ctr               |                   |                   |                   | $\beta$ stop/ $\beta$ stop |                   |                   |                     | N    |
|------------------------------------------|-------------------|-------------------|-------------------|-------------------|----------------------------|-------------------|-------------------|---------------------|------|
|                                          | -ISO              |                   | +ISO              |                   | -ISO                       |                   | +ISO              |                     |      |
| $Ca_v\beta_2$ Stop                       | 17.5 $\pm$<br>1.6 | 73.6 $\pm$<br>4.5 | 24.8 $\pm$<br>2.9 | 84.8 $\pm$<br>5.1 | 22.6 $\pm$<br>3.7          | 80.4 $\pm$ 6.1    | 31.4 $\pm$<br>1.7 | 96.4 $\pm$<br>6.4   | 6;5  |
| $Ca_v\beta_2^{stop}$ x<br>$Ca_v1.2^{SA}$ | 17.4 $\pm$<br>1.2 | 78.4 $\pm$<br>4.2 | 23.8 $\pm$<br>2.2 | 91.2 $\pm$<br>5.8 | 21.2 $\pm$<br>3.3          | 120 $\pm$ 41      | 28.3 $\pm$<br>3.2 | 108.8 $\pm$<br>22.7 | 8;5  |
| $Ca_v\beta_2^{stop}$ x<br>$Ca_v1.2^{SF}$ | 20.6 $\pm$<br>1.7 | 133.8 $\pm$<br>29 | 28.2 $\pm$<br>3.5 | 147 $\pm$ 40      | 27.6 $\pm$<br>3.2          | 138.3 $\pm$<br>19 | 27.1 $\pm$<br>4.2 | 162.7 $\pm$<br>29   | 10;7 |

**Suppl Figure 1****Southern Blot and sequence of the mutated  $\beta 2$  gene.**

A: Southern blot strategy. After restriction digestion with BspHI the Neo probe detects a 3.9 kb fragment. The red sequence is outside of the targeting vector.

B: Southern blot with Neo probe. +: positive control (5' extended screening vector that was used to test primers and the Neo probe). 15 $\mu$ g/20 $\mu$ g: ES cell DNA of the  $Ca_v\beta$ Stop clone after restriction digestion with BspHI. This clone was injected into the blastocytes and generated the  $Ca_v\beta$ stop mouse line. WT: WT DNA after restriction digestion with BspHI.

C: sequence excerpt of exon 14 from a  $Ca_v\beta_2$  WT mouse heart

D: sequence excerpt of exon 14 from a  $Ca_v\beta_2$ Stop mouse heart; by deletion of the 2 cytosines the TGA stop-codon comes in frame

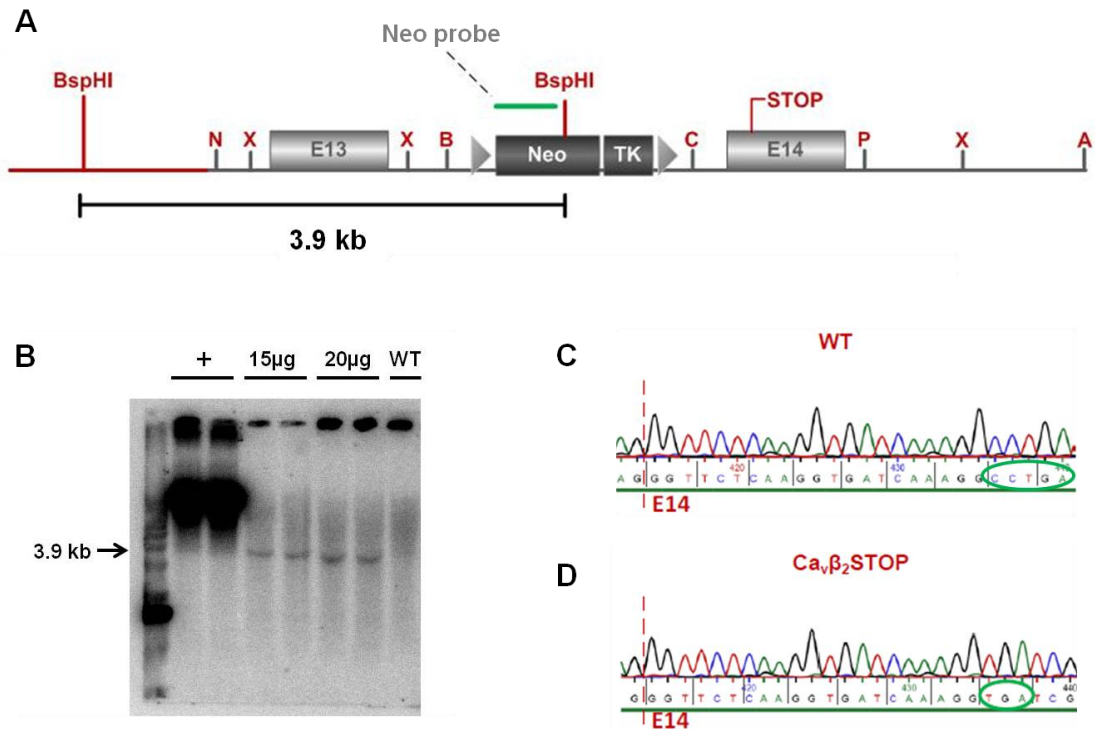**Suppl Figure 2** **$\beta$ stop mice have normal heart rate (HR, left panel) and activity (right panel) under control condition.**

Heart rate is measured as beats per min (bpm) and activity as counts per min (cpm). Both values are obtained by ECG recording (DSI ETA-F20 transmitter) in awake, freely moving animals. The number of animal observed is given in the columns. Heterozygous (Ctr  $\beta$ stop) mice open columns; homozygous  $\beta$ stop mice black columns

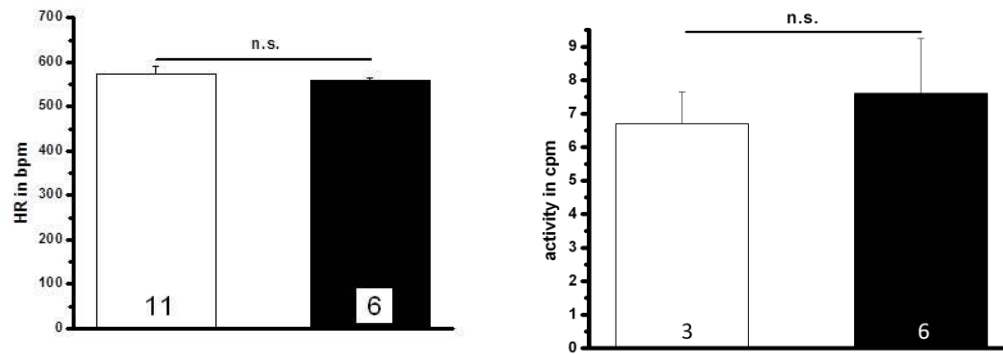

### Suppl Figure 3

**Circadian cardiac rhythm in heterozygous Ctr SA $\beta$ Stop and homozygous SA $\beta$ Stop mice (left panel) and in heterozygous Ctr SF $\beta$ Stop and homozygous SF $\beta$ Stop mice (right panel).**

Heterozygous (Ctr SA $\beta$ Stop/Ctr SF $\beta$ Stop) mice are black; homozygous mice (SA $\beta$ Stop/SF $\beta$ Stop) are red.

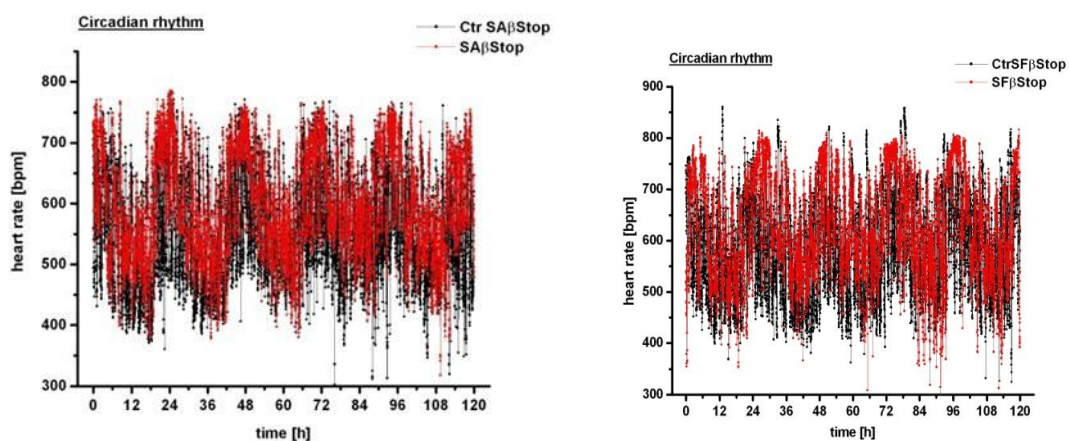

**Suppl Fig 4**

**In vivo stimulation of heart rate by i.p. injection of isoproterenol (left panel) or phenylephrine (right panel) in Ctr SA $\beta$ Stop and SA $\beta$ Stop mice.**

For experimental details see Experimental Procedures.

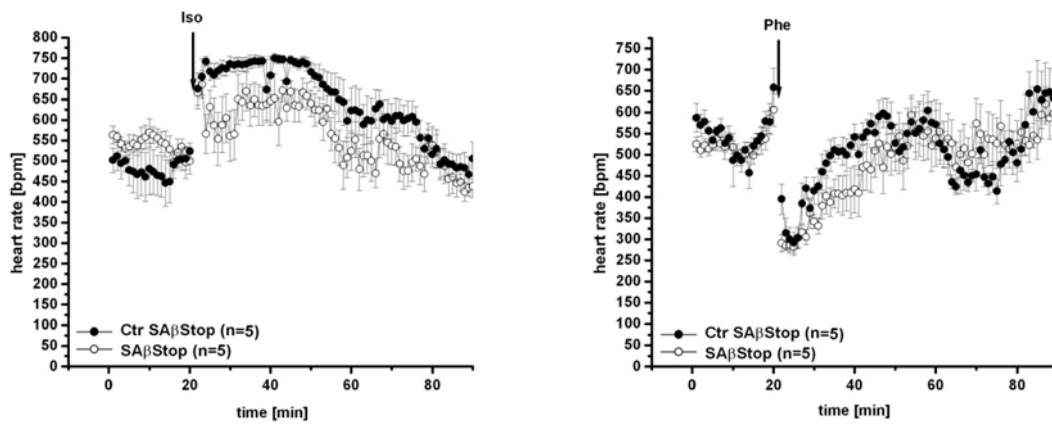**Suppl Fig 5**

**In vivo stimulation of heart rate by i.p. injection of isoproterenol (left panel) or phenylephrine (right panel) in Ctr SF $\beta$ Stop and SF $\beta$ Stop mice.**

For experimental details see Experimental Procedures.

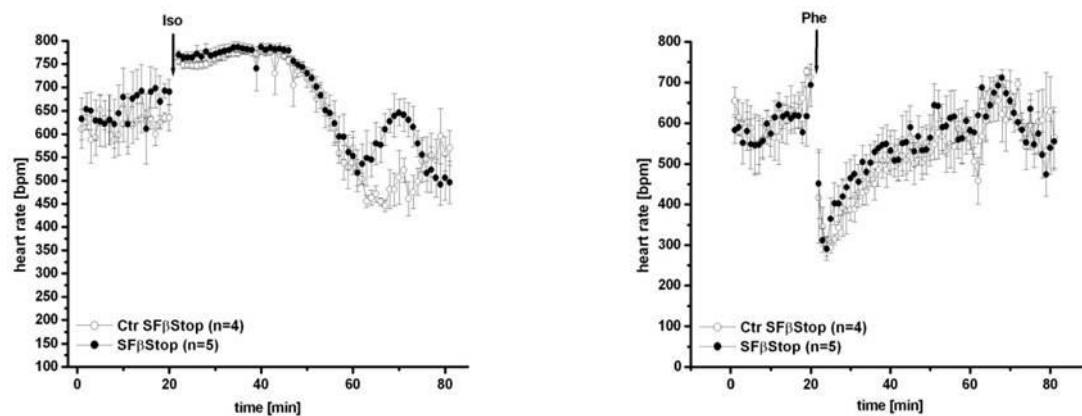**References**

1. Lemke, T., Welling, A., Christel, C. J., Blaiich, A., Bernhard, D., Lenhardt, P., Hofmann, F., and Moosmang, S. (2008) *J Biol Chem* **283**(50), 34738-34744
2. Lee, T. S., Karl, R., Moosmang, S., Lenhardt, P., Klugbauer, N., Hofmann, F., Kleppisch, T., and Welling, A. (2006) *J Biol Chem* **281**(35), 25560-25567
3. Perez-Reyes, E., Castellano, A., Kim, H. S., Bertrand, P., Baggstrom, E., Lacerda, A. E., Wei, X. Y., and Birnbaumer, L. (1992) *J Biol Chem* **267**(3), 1792-1797

4. Bunemann, M., Gerhardstein, B. L., Gao, T., and Hosey, M. M. (1999) *J Biol Chem* **274**(48), 33851-33854
5. Grueter, C. E., Abiria, S. A., Dzhura, I., Wu, Y., Ham, A. J., Mohler, P. J., Anderson, M. E., and Colbran, R. J. (2006) *Mol Cell* **23**(5), 641-650
6. Viard, P., Butcher, A. J., Halet, G., Davies, A., Nurnberg, B., Hebllich, F., and Dolphin, A. C. (2004) *Nat Neurosci* **7**(9), 939-946
7. Yang, L., Liu, G., Zakharov, S. I., Bellinger, A. M., Mongillo, M., and Marx, S. O. (2007) *Circ Res* **101**(5), 465-474
